# Supplementary material
Source: publisher site journal article supplement (https://www.dovepress.com/article/360147)
Supplement: Supplementary file 1 [file get_supplementary_file.php]

Supplemental Table 1: Differentially expressed genes in the acquired radioresistant cells

| Differential expression                | Gene names                                                                                                                                                                                                                                                                                                                                                                                                                                                         | Count |
|----------------------------------------|--------------------------------------------------------------------------------------------------------------------------------------------------------------------------------------------------------------------------------------------------------------------------------------------------------------------------------------------------------------------------------------------------------------------------------------------------------------------|-------|
| Upregulated genes in HCT-116-R cells   | AZGP1, TPI1, RPL7, B2M, FARSA, RPL7, FTH1, MCM3, RPL18, VDAC2, FAT1, LMAN2L, FAM168B, CS, TOX4, DVL1, PCDH1, GUCD1, CSNK2A1, EEF1A1, VDAC1, URGCP, ASS1, EIF6, FLII, FKBP8, HUWE1, S100A16, HMOX2, TUBA4A, USP39, VARS2, SIRT7, TMEM230, ILVBL, TSPAN9, EI24, GOLM1, BTG3, IL4R, LRP5, ALDH2, ANKRD17, FAM120A, TATDN2, CIT, ETV4, ANKFY1, NPTXR, PFN2, PRMT5                                                                                                      | 51    |
| Upregulated genes in CX-1-R cells      | CLCN3, AZGP1, RNPS1, LMNA, CSDE1, HDGF, XPO1, UBE2V1, PSMD12, MAPK1, TXLNA, MCM3, JPT2, NHS, MBNL1, EDC3, RPS10, PRRC2B, HIRA, MARS, INF2, PAICS, ZER1, PYCR1, DEK, H3F3A, DIMT1, CLCN3, CRK, SMAP2, DDOST, SEPT9, RTF2, SP3, PHF6, ATP5MC2, PPME1                                                                                                                                                                                                                 | 37    |
| Downregulated genes in HCT-116-R cells | HSPA8, PAIP2, MTAP, TSC22D1, TMBIM6, B2M, HSPD1, PFKM, EIF4A1, PODXL, CD109, SDC3, CALU, TP53I11, ARHGAP5, MORF4L2, ST6GAL1, WNT16, EIF2AK2, SLC52A2, TTI1, DNAJC14, SH3PXD2B, ERBB2, AKT1, COPS7A, VPS13B, TAF9, CNOT1, RPS3, PYCR1, SEC16A, KLF6, CBX1, PXN, HMGN2, EIF5A, ANXA1, ANT1, UAP1, PXN, GNS, CRIM1, ZNF264, CLTC, CYBRD1, NUP160, CDKN1A                                                                                                              | 47    |
| Downregulated genes in CX-1-R cells    | LGMN, TAGLN2, CS, PRSS2, PTGES3, TPI1, HIST1H2BF, EPS8, PAICS, MAST2, STAT6, HSPA9, TM4SF4, CCT3, HDGF, ST3GAL1, IRAK1, PUM1, CANX, G6PD, MORF4L2, PBXIP1, TPI1, CSDE1, LASP1, RNF41, SYT7, RPL18, G3BP2, TMEM59, GAK, SEC23B, KCTD20, PYCR1, PACSIN2, EIF4G1, RPS10-NUDT3, URGCP, TMEM164, CDC25B, HIST1H2BE, EXOC3, HSPA8, GATAD2A, RAVR1, MRPL10, MAGED1, MINK1, CAST, MDH1, HNRNPUL1, SLC25A38, HNRNPK, SMS, PCCB, COG5, CAP1, PEA15, PRMT5, ELK1, EIF4B, MTA1 | 61    |

Supplemental Table 2: The details of included datasets in CRC samples undergoing radiation

| Dataset   | Author              | Country   | Year | Platform | Sample type | Exp mean $\pm$ Exp SD | Ctrl mean $\pm$ Ctrl SD |
|-----------|---------------------|-----------|------|----------|-------------|-----------------------|-------------------------|
| GSE60331  | Verstraete M et al. | Belgium   | 2014 | GPL15207 | Tissue      | 7.857 $\pm$ 1.12      | 7.356 $\pm$ 1.082       |
| GSE20298  | Spitzner M et al.   | Germany   | 2010 | GPL4133  | Cell lines  | 10.122 $\pm$ 2.010    | 10.402 $\pm$ 2.749      |
| GSE43206  | Jang S et al.       | Korea     | 2012 | GPL6244  | Cell lines  | 7.550 $\pm$ 1.070     | 6.893 $\pm$ 0.853       |
| GSE46862  | Gim J et al.        | Korea     | 2013 | GPL6244  | Tissue      |                       |                         |
| GSE97543  | Emons G et al.      | USA       | 2017 | GPL13497 | Cell lines  | 3.647 $\pm$ 0.679     | 3.621 $\pm$ 0.622       |
| GSE150082 | Sendoya JM et al.   | Argentina | 2020 | GPL13497 | Tissue      |                       |                         |
| GSE35452  | Watanabe T et al.   | Japan     | 2012 | GPL570   | Tissue      | 4.177 $\pm$ 1.234     | 3.884 $\pm$ 1.129       |
| GSE119409 | Yi H et al.         | China     | 2018 | GPL570   | Tissue      |                       |                         |

Supplemental Table 3: The details of included datasets in CRC samples versus normal tissue

| Dataset   | Author                  | Country        | Year | Platform  | Sample type | Exp mean $\pm$ Exp SD | Ctrl mean $\pm$ Ctrl SD |
|-----------|-------------------------|----------------|------|-----------|-------------|-----------------------|-------------------------|
| GSE24514  | Aaltonen LA et al.      | Finland        | 2010 | GPL96     | Tissue      | 6.043 $\pm$ 1.140     | 4.816 $\pm$ 0.699       |
| GSE49355  | Del Rio M et al.        | France         | 2013 | GPL96     | Tissue      |                       |                         |
| GSE68468  | Mervi H et al.          | USA            | 2015 | GPL96     | Tissue      |                       |                         |
| GSE77953  | Frierson H Jr et al.    | USA            | 2016 | GPL96     | Tissue      |                       |                         |
| GSE110223 | Vlachavas E et al.      | Greece         | 2018 | GPL96     | Tissue      |                       |                         |
| GSE54986  | Ding L et al.           | China          | 2014 | GPL10558  | Tissue      | 7.267 $\pm$ 0.760     | 6.243 $\pm$ 0.277       |
| GSE75548  | Wei J et al.            | China          | 2015 | GPL10558  | Tissue      |                       |                         |
| GSE106582 | Andrieux G et al.       | Germany        | 2017 | GPL10558  | Tissue      |                       |                         |
| GSE81558  | Sayagues JM et al.      | Spain          | 2016 | GPL15207  | Tissue      | 7.704 $\pm$ 1.006     | 5.922 $\pm$ 0.518       |
| GSE15781  | Paulssen RH et al.      | Norway         | 2009 | GPL2986   | Tissue      | 13.461 $\pm$ 2.147    | 12.471 $\pm$ 0.727      |
| GSE20842  | Gaedcke J et al.        | Germany        | 2010 | GPL4133   | Tissue      | 11.900 $\pm$ 1.165    | 8.690 $\pm$ 0.536       |
| GSE24713  | LaPointe LC et al.      | Australia      | 2010 | GPL11060  | Tissue      | 9.036 $\pm$ 0.470     | 8.378 $\pm$ 0.424       |
| GSE25071  | Ågesen TH et al.        | Norway         | 2010 | GPL2986   | Tissue      | 15.778 $\pm$ 1.910    | 12.310 $\pm$ 0.840      |
| GSE28000  | Jovov B et al.          | USA            | 2011 | GPL1708   | Tissue      | 0.930 $\pm$ 0.203     | 1.207 $\pm$ 0.519       |
| GSE44076  | Solé X et al.           | Spain          | 2013 | GPL13667  | Tissue      | 7.600 $\pm$ 1.324     | 4.805 $\pm$ 0.712       |
| GSE47063  | Uribe-Lewis S et al.    | United Kingdom | 2013 | GPL6102   | Tissue      | 8.545 $\pm$ 1.218     | 6.424 $\pm$ 0.533       |
| GSE87211  | Hu Y et al.             | USA            | 2016 | GSE87211  | Tissue      | 11.309 $\pm$ 1.300    | 8.847 $\pm$ 0.672       |
| GSE103512 | Brouwer-Visser J et al. | USA            | 2017 | GPL13158  | Tissue      | 7.673 $\pm$ 0.488     | 7.002 $\pm$ 0.409       |
| GSE113513 | Peng J et al.           | China          | 2018 | GPL15207  | Tissue      | 7.117 $\pm$ 0.982     | 5.550 $\pm$ 0.410       |
| GSE115261 | Kwok ZH et al.          | Singapore      | 2018 | GSE115261 | Tissue      | 7.144 $\pm$ 0.962     | 5.031 $\pm$ 0.412       |
| GSE141174 | Hammarströ              | Sweden         | 2019 | GPL6104   | Tissue      | 6.902 $\pm$           | 6.871 $\pm$             |

|               |              |       |      |                   |        |                   |                  |
|---------------|--------------|-------|------|-------------------|--------|-------------------|------------------|
|               | m S et al.   |       |      |                   |        | 0.748             | 0.358            |
| GSE156355     | Sun H et al. | China | 2020 | GPL21185          | Tissue | 11.085<br>± 0.435 | 7.894 ±<br>0.228 |
| TCGA+CT<br>Ex | N/A          | USA   | 2017 | IlluminaHis<br>eq | Tissue | 4.644 ±<br>1.475  | 1.817 ±<br>0.778 |

Supplemental Figure 1. GO and KEGG enrichment analyses of differential expressed genes in the radioresistant cellular model

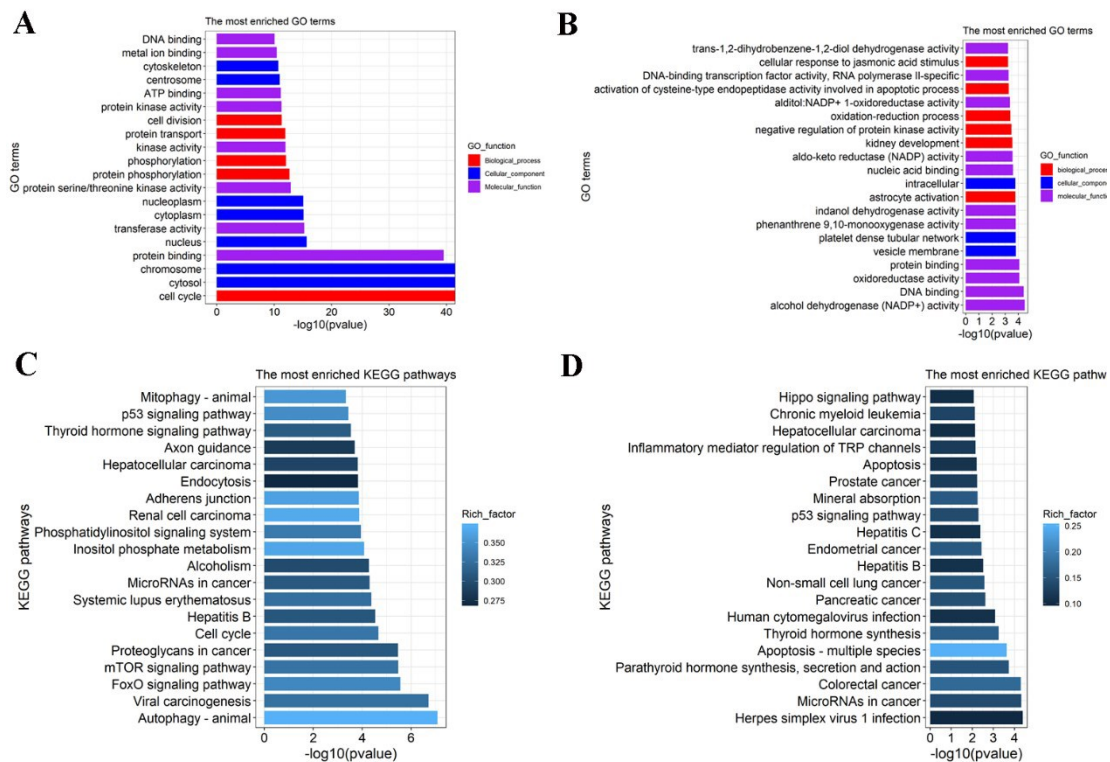

(A) histogram of GO enrichment of upregulated genes in HCT-116-R versus HCT-116 cells; (B) histogram of GO enrichment of upregulated genes in CX-1-R versus CX-1 cells; (C) histogram of KEGG pathway of upregulated genes in HCT-116-R versus HCT-116 cells; (D) histogram of KEGG pathway of upregulated genes in CX-1-R versus CX-1 cells.

Supplemental Figure 2. Diagnostic meta-analysis of AZGP1 expression in radioresistant versus radiosensitive CRC samples

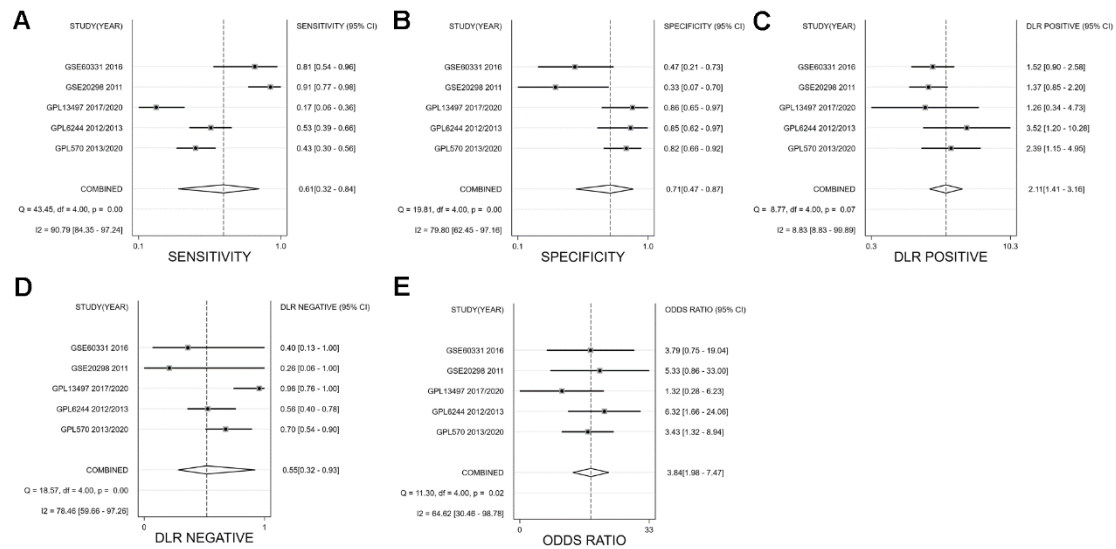

(A) diagnostic sensitivity; (B) diagnostic specificity; (C) positive likelihood ratio; (D) negative likelihood ratio; (E) diagnostic odds ratio.

Supplemental Figure 3. Diagnostic meta-analysis of AZGP1 expression in CRC tissue and normal colorectal tissue

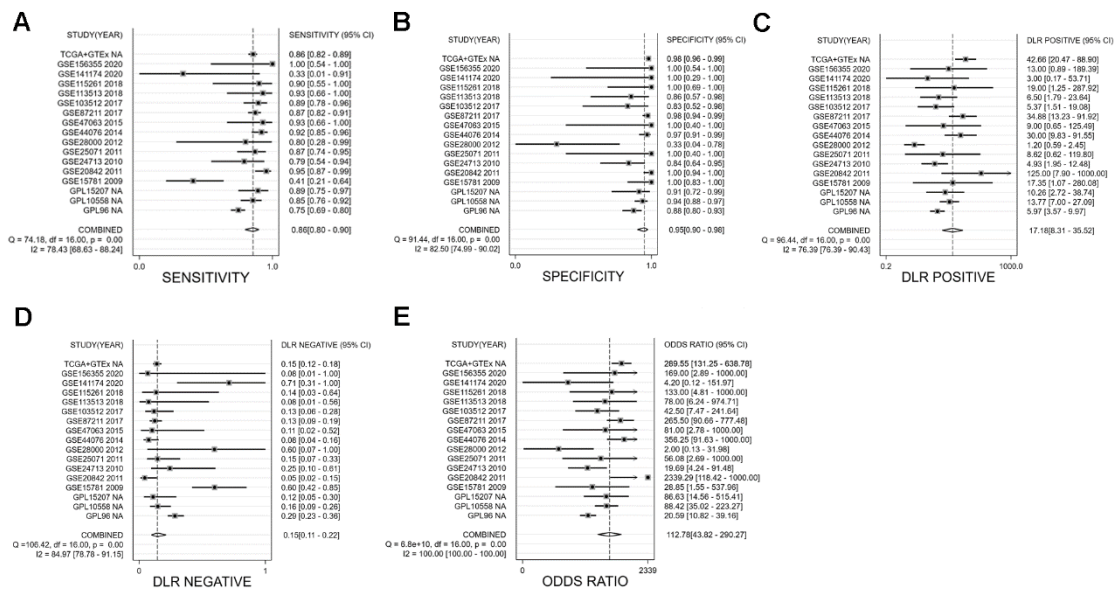

(A) diagnostic sensitivity; (B) diagnostic specificity; (C) positive likelihood ratio; (D) negative likelihood ratio; (E) diagnostic odds ratio.
